# Supplementary material for: Integration of Bulk and Single-Cell RNA-Seq Data to Construct a Prognostic Model of Membrane Tension-Related Genes for Colon Cancer
Source: MDPI journal article supplement (doi:10.3390/vaccines10091562), 2022-09-19
Supplement: s1 [file s1]

## *Supplementary Material*

**Supplementary Table S1 Demographic information of COAD patients in the present study.**

| <b>Variables</b>  | <b>TCGA-COAD<br/>(Training)</b> | <b>GSE14333<br/>(Validation1)</b> | <b>GSE103479<br/>(Validation2)</b> |
|-------------------|---------------------------------|-----------------------------------|------------------------------------|
| <b>Total</b>      | 426                             | 223                               | 154                                |
| <b>Gender</b>     |                                 |                                   |                                    |
| Female            | 198                             | 105                               | 68                                 |
| Male              | 228                             | 118                               | 86                                 |
| <b>Age</b>        |                                 |                                   |                                    |
| <60               | 120                             | 60                                | 28                                 |
| ≥60               | 306                             | 163                               | 124                                |
| <b>AJCC stage</b> |                                 |                                   |                                    |
| I                 | 73                              | -                                 | 0                                  |
| II                | 165                             | -                                 | 82                                 |
| III               | 119                             | -                                 | 72                                 |
| VI                | 58                              | -                                 | 0                                  |
| Unknow            | 11                              | -                                 | 0                                  |
| <b>T stage</b>    |                                 |                                   |                                    |
| T1                | 10                              | -                                 | 1                                  |
| T2                | 74                              | -                                 | 6                                  |
| T3                | 291                             | -                                 | 109                                |
| T4                | 50                              | -                                 | 38                                 |
| Tis               | 1                               | -                                 | 0                                  |
| <b>M stage</b>    |                                 |                                   |                                    |
| M0                | 317                             | -                                 | 85                                 |
| M1                | 58                              | -                                 | 0                                  |
| Mx                | 44                              | -                                 | 69                                 |
| Unknow            | 7                               | -                                 | 0                                  |
| <b>N stage</b>    |                                 |                                   |                                    |
| N0                | 253                             | -                                 | 82                                 |

|    |    |   |    |
|----|----|---|----|
| N1 | 99 | - | 50 |
| N2 | 74 | - | 22 |

---

**Supplementary Table S2 44 membrane tension-related genes.**

| Number | Gene     | Number | Gene     |
|--------|----------|--------|----------|
| 1      | RHOA     | 23     | FNBP1    |
| 2      | CTNNBIP1 | 24     | MTSS1L   |
| 3      | EZR      | 25     | TRIP10   |
| 4      | RDX      | 26     | CRTC2    |
| 5      | MSN      | 27     | CFL1     |
| 6      | MYO1A    | 28     | CAPZB    |
| 7      | GSK3b    | 29     | DIAPH1   |
| 8      | FGFR1    | 30     | MYH9     |
| 9      | GBF1     | 31     | MYH10    |
| 10     | BAIAP2   | 32     | PIEZO1   |
| 11     | ARF1     | 33     | SDC4     |
| 12     | CDC42    | 34     | PECAM1   |
| 13     | ACTR2    | 35     | CDH1     |
| 14     | ACTR3    | 36     | ITGB1    |
| 15     | PICK1    | 37     | FERMT2   |
| 16     | EGF      | 38     | TIMP1    |
| 17     | CHMP4B   | 39     | CAV1     |
| 18     | EGFR     | 40     | DNM2     |
| 19     | TSG101   | 41     | MYO1B    |
| 20     | ALIX     | 42     | ARHGAP26 |
| 21     | SLK      | 43     | FLNA     |
| 22     | STK10    | 44     | MYO1C    |

**Supplementary Table S3 Multivariate COX regression analysis results of model genes.**

| Gene  | Coef     | HR       | HR.95L   | HR.95H   | <i>p</i> Value |
|-------|----------|----------|----------|----------|----------------|
| CDC42 | -0.04318 | 0.957736 | 0.916508 | 1.000819 | 0.054418       |
| EGFR  | 0.032753 | 1.033295 | 1.004365 | 1.063058 | 0.023785       |
| TIMP1 | 0.001374 | 1.001375 | 0.999951 | 1.002802 | 0.058403       |
| CAV1  | 0.011181 | 1.011243 | 1.001203 | 1.021385 | 0.028088       |

**Supplementary Table S4 Molecular docking scores of the three compounds.**

| Rank | PubChem CID | Compound name | Affinity score<br>(kcal/mol) |
|------|-------------|---------------|------------------------------|
| 1    | 300471      | Elesclomol    | -7.787                       |
| 2    | 479503      | Shikonin      | -7.2                         |
| 3    | 5280757     | Bryostatin_1  | -7.1                         |

**Supplementary Figures**

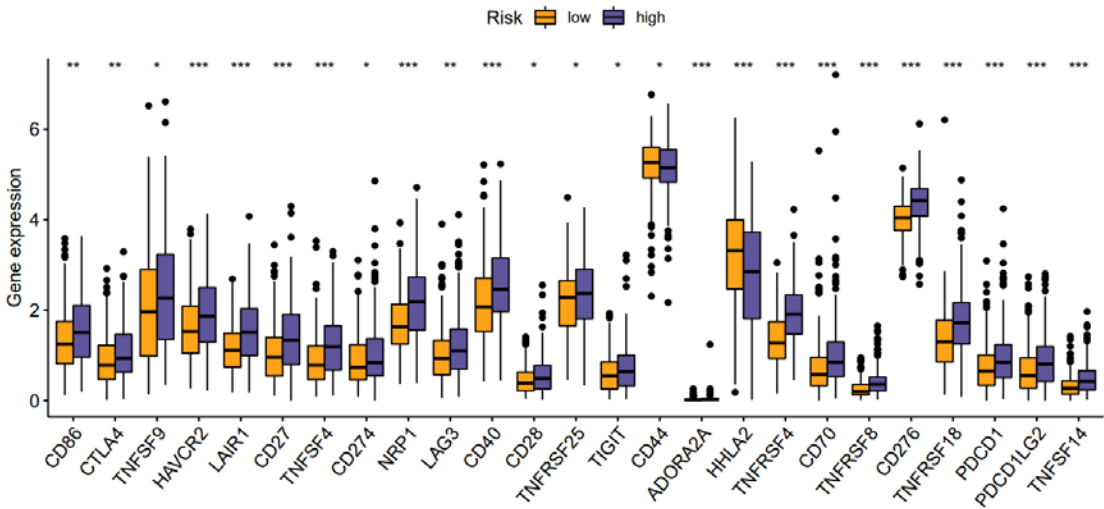

**Supplementary Figure S1 The boxplots for the comparison of the immune checkpoints genes between the high-risk and low-risk groups in the colon cancer patients. \*p < 0.05, \*\*p < 0.01, and \*\*\*p < 0.001.**

## inferCNV

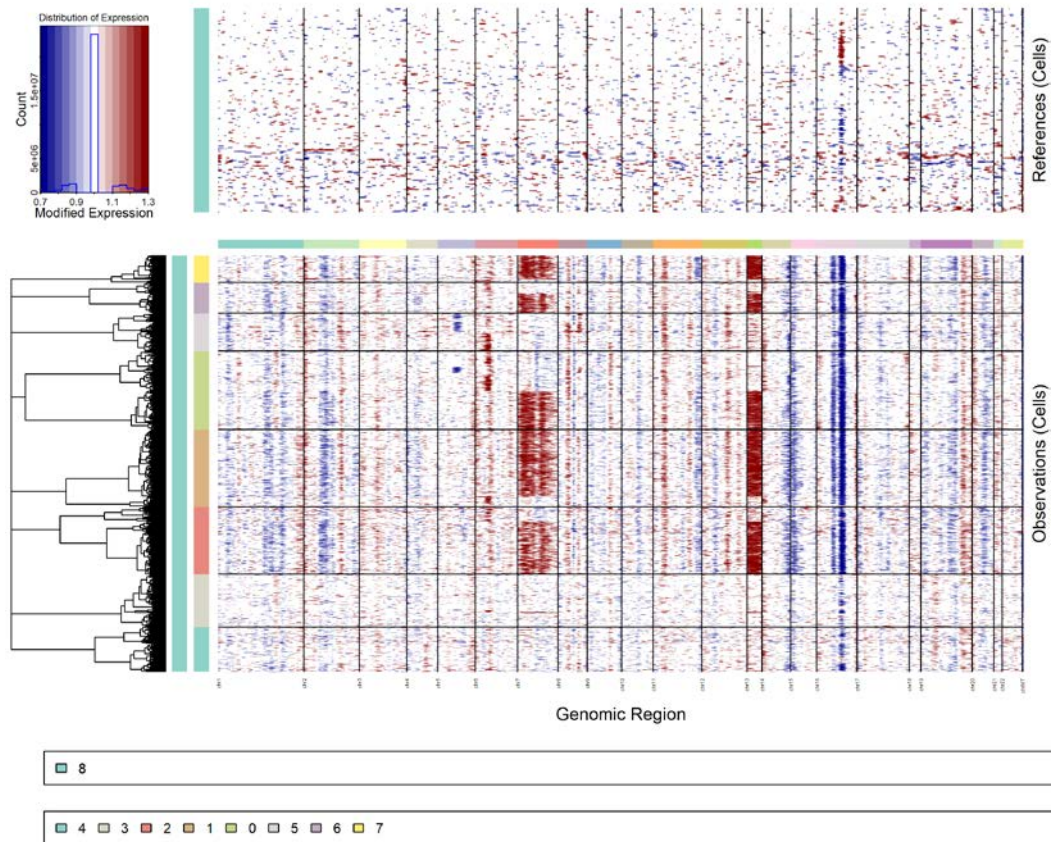

**Supplementary Figure S2 InferCNV analysis in epithelial cell subsets.**

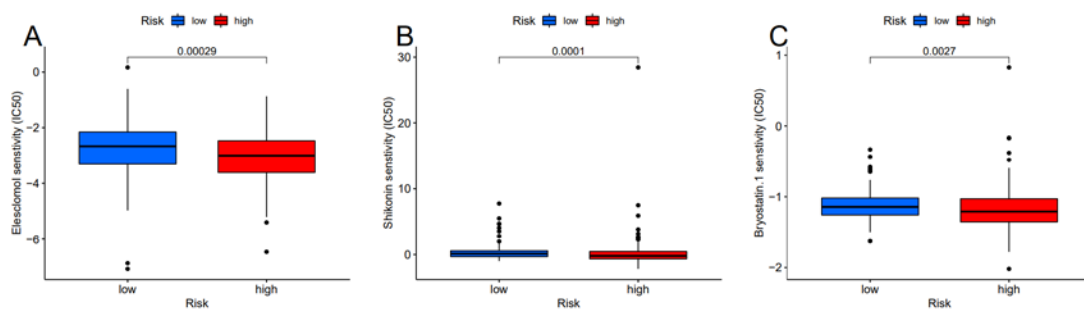

**Supplementary Figure S3 Drug sensitivity analysis in the high-risk and low risk groups in colon cancer patients. (A) Elesclomol (B), Shikonin (C) and Bryostatins 1.**
